# Supplementary material for: Detection of Parechovirus A1 with Monoclonal Antibody against Capsid Protein VP0
Source: MDPI journal article supplement (doi:10.3390/microorganisms8111794), 2020-11-16
Supplement: s1 [file s1]

## Supplementary information

Figure S1

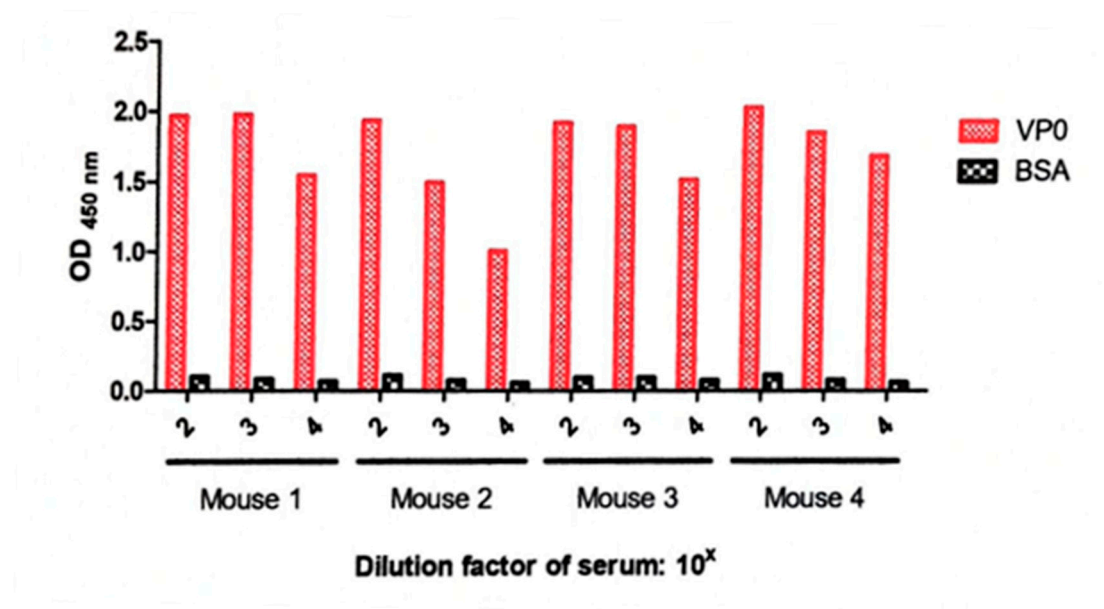

Figure S1. ELISA assay using mouse antiserum.

The mouse antiserum ( $10^{-2}$ ~ $10^{-4}$  dilution) were added into the PeV-A1 VP0 antigen and BSA (negative control)-coated ELISA plate. After reaction, the absorbance value of O.D.450 was measured.
